# Supplementary material for: Development and validation of TaqMan probe based real time PCR assays for the specific detection of genotype A and B small ruminant lentivirus strains
Source: PubMed Central journal article supplement (PMC3766269; doi:10.1186/1746-6148-9-172), 2013-09-03
Supplement: 1746-6148-9-172-S1.pdf [file 1746-6148-9-172-S1.pdf]

A

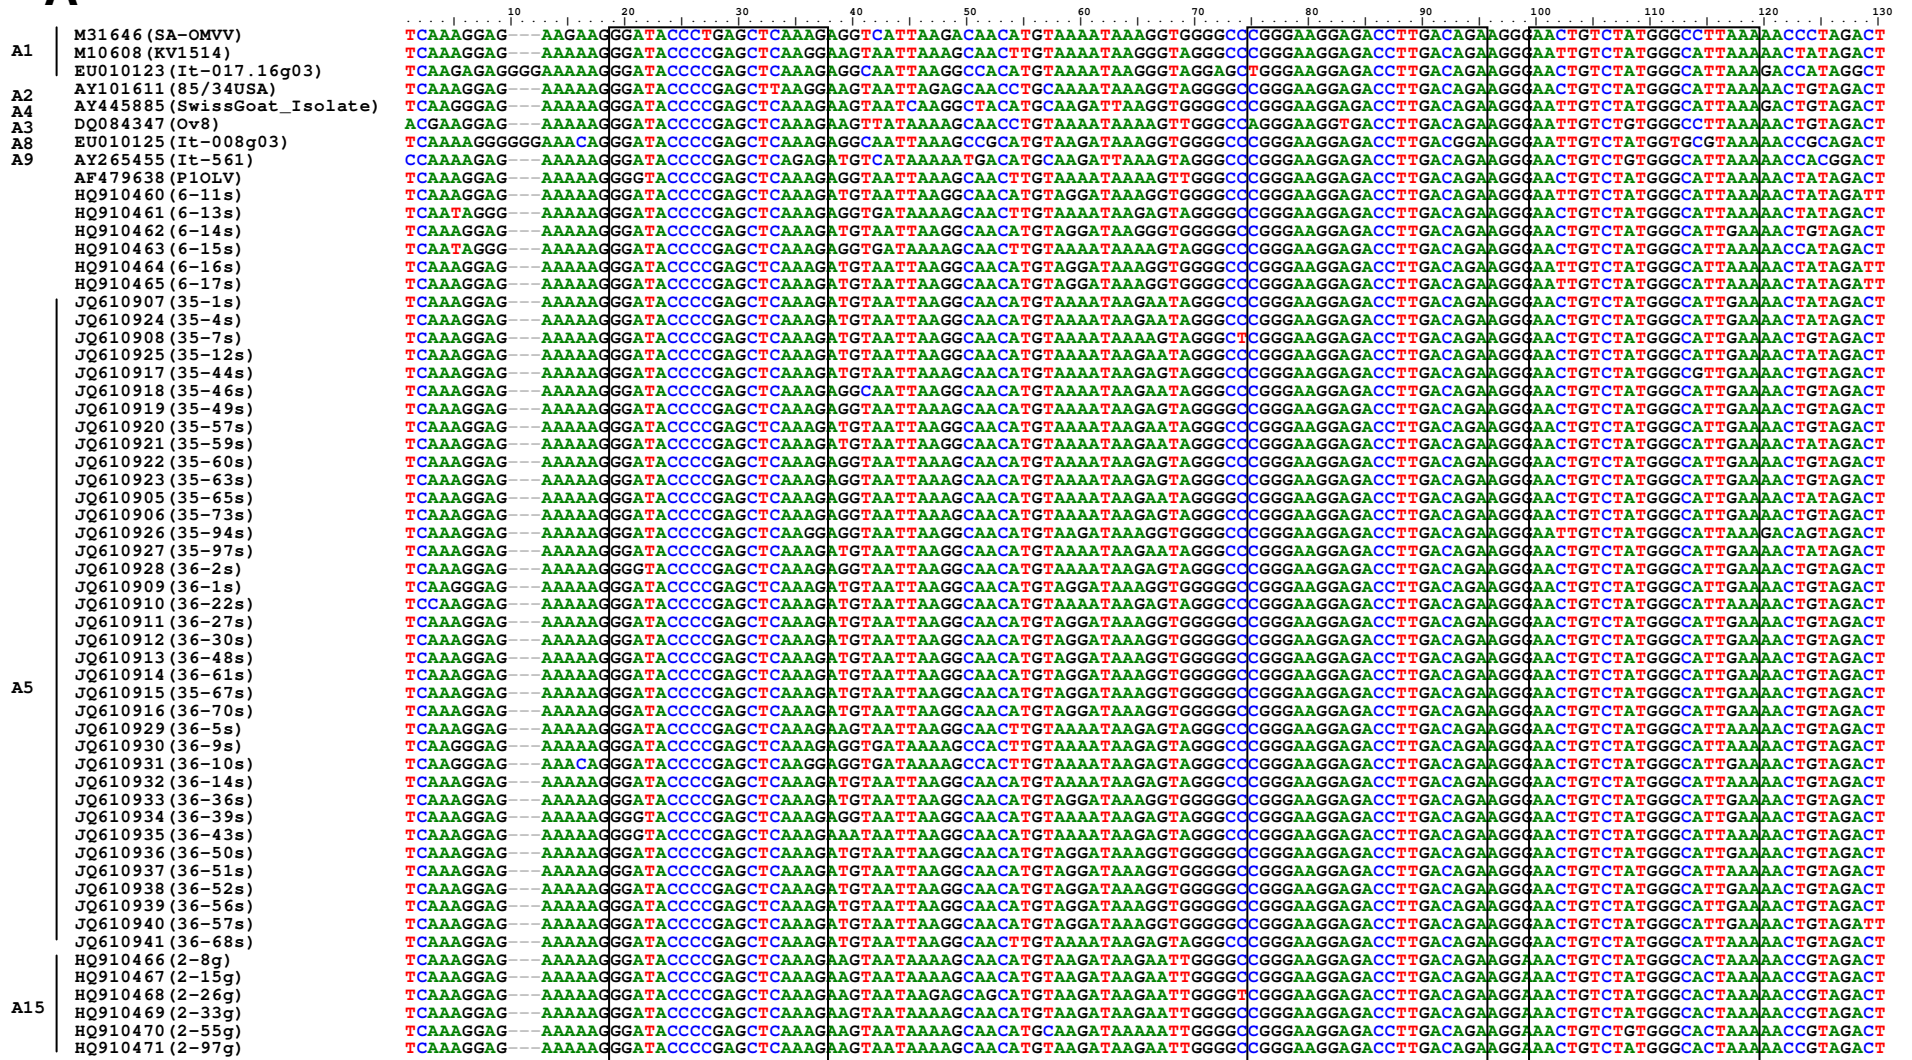

Y = C or T  
 K = G or T  
 R = A or G

MVVMA F1  
 5' GGATACCCCGAGCTCAAAG 3'

MVVMA R3 (reverse complement)  
 5' TTYAAGCCCAAGACARTT 3'

MVVMA (reverse complement)  
 5' FAM-TCTGTCAAGGTCTCTTCCG-3' TAMRA
